# Supplementary material for: Recyclable functionalized polymer films for the efficient removal of hexavalent chromium from aqueous solutions
Source: Royal Society of Chemistry journal article supplement (doi:10.1039/c9ra06595d), 2019-01-01
Supplement: c9ra06595d1.pdf [file c9ra06595d1.pdf]

## Supporting Information

### Recyclable Functionalized Polymer Film for Efficient Removal of Hexavalent Chromium from Aqueous Solution

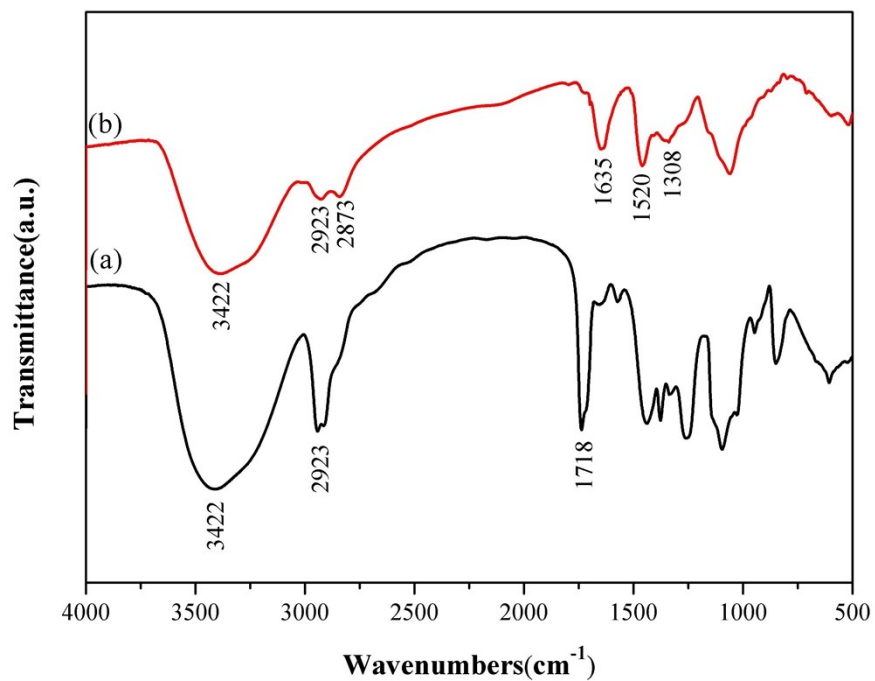

**Figure S1.** FT-IR spectra of the (a) PVA powder and (b) PEI-PVA microspheres.

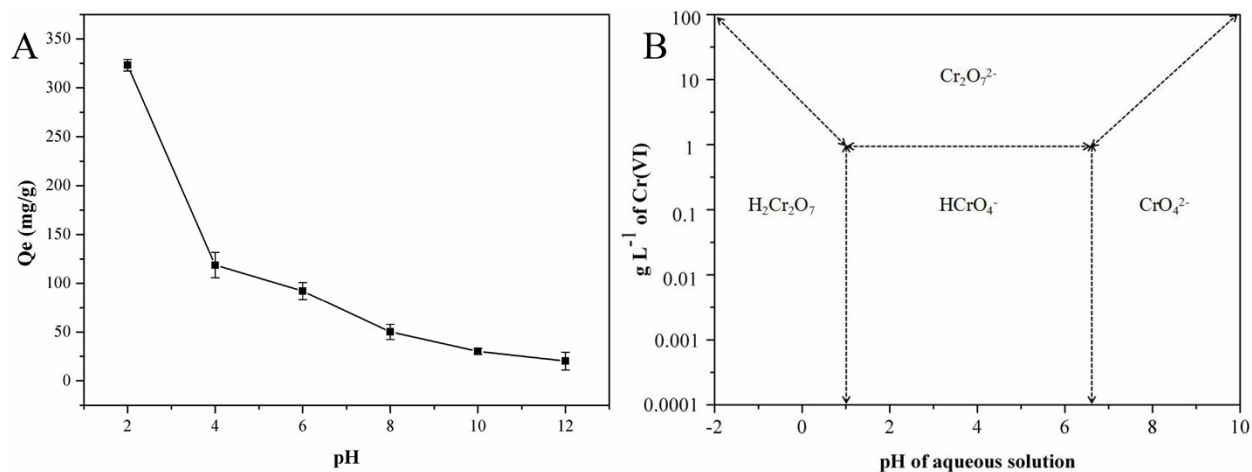

**Figure S2.** (A) Effect of the pH on the Cr(VI) adsorption and (B) Relative distribution of Cr(VI) species in water as a function of pH and Cr(VI) concentration.

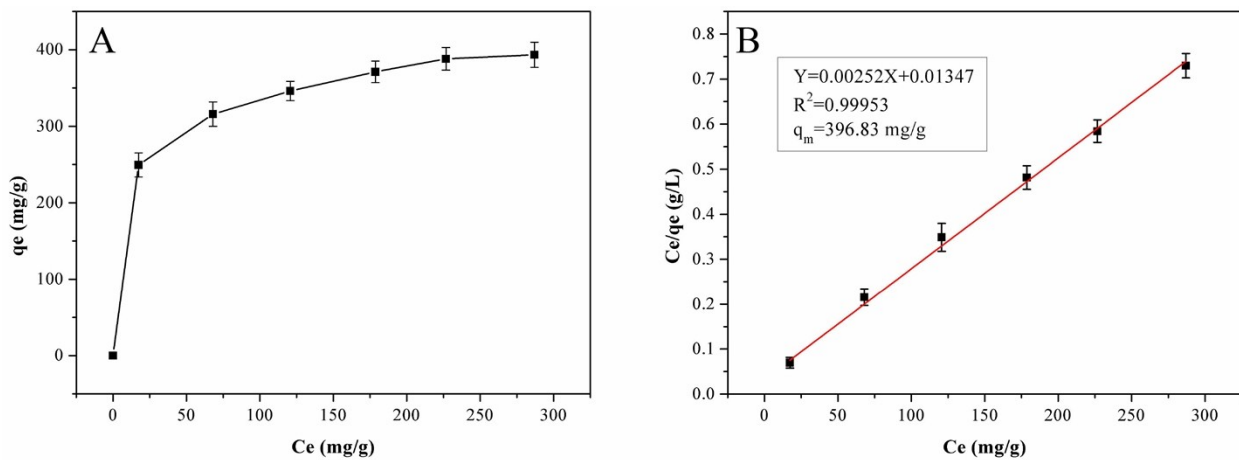

**Figure S3.** (A) Adsorption isotherm of Cr(VI) onto the PEI-PVA microspheres (adsorbent does, 10 mg; volume of the medium, 20 mL; pH, 2.0; contact time, 36 h and temperature, 25°C ); (B) Fit of equilibrium data to Langmuir isotherm model.

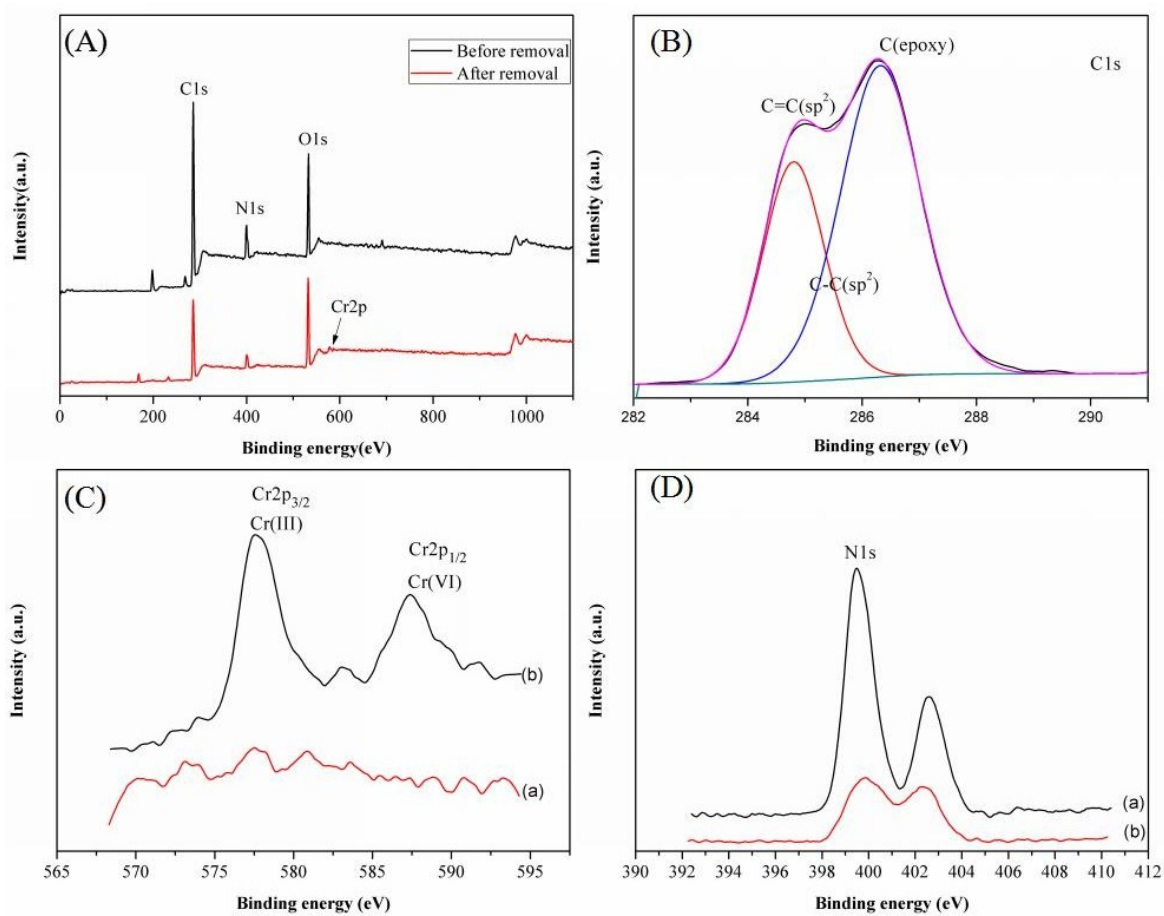

**Figure S4.** (A) Full-range XPS spectra of PPF before and after adsorption of Cr (VI) ions, (B) XPS spectra of C1s of PPF, (C) XPS spectra of Cr2p of PPF before (a) and after (b) adsorption of Cr (VI) ions, (D) XPS spectra of N1s (a) and after (b) adsorption of Cr (VI) ions.

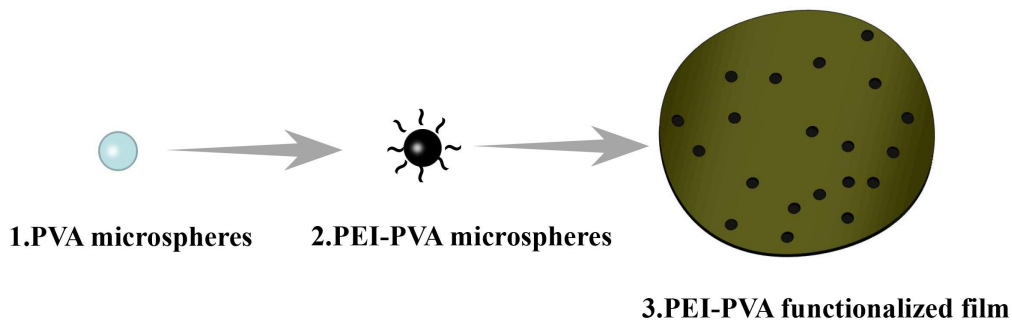

**Scheme S1.** Schematic illustration of the fabrication process of PEI-PVA functionalized film.

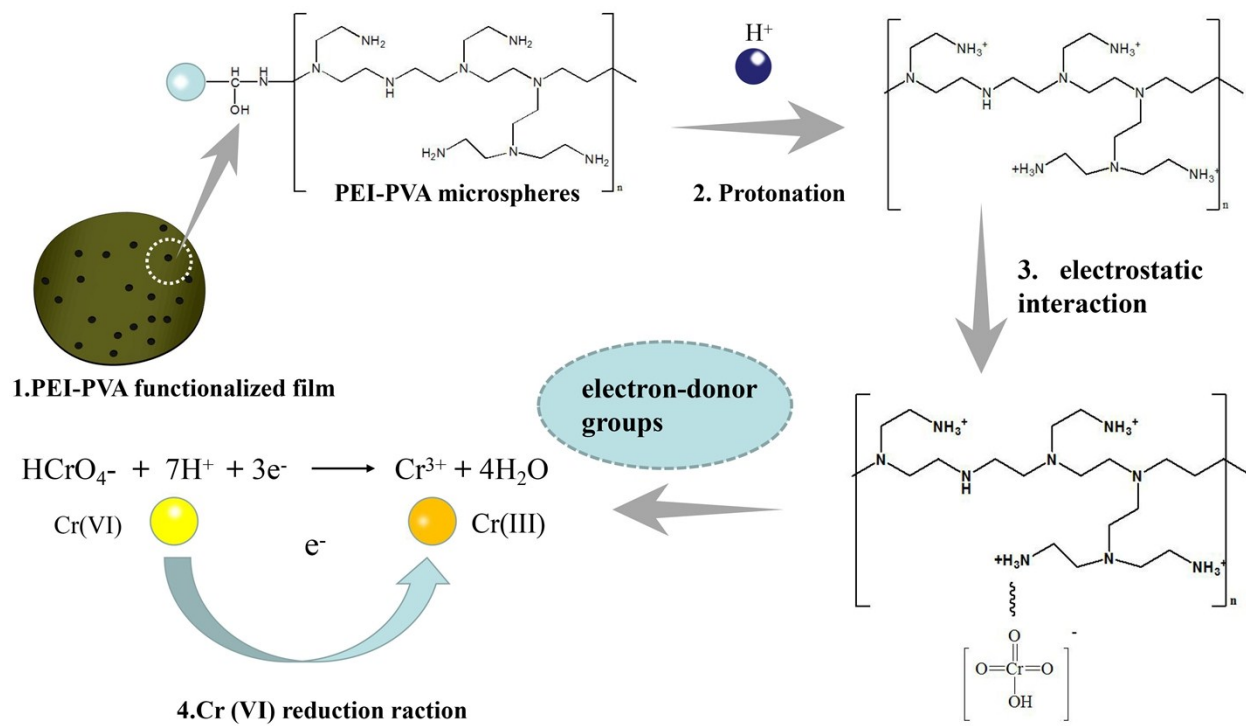

**Scheme S2.** Schematic illustration of the PPF and its mechanism for the Cr(VI) removal.

**Table S1.** Fit of equilibrium data to Langmuir isotherm model.

| Metal ion | K       | q <sub>m</sub> | R <sup>2</sup> |
|-----------|---------|----------------|----------------|
| Cr (VI)   | 0.18701 | 396.825        | 0.99953        |

**Table S2.** Comparison of Maximum Adsorption Capacity of Cr(VI) on PEI-PVA microspheres with Other Adsorbents.

| Materials                                                  | Experiment condition | q <sub>max</sub> | Ref        |
|------------------------------------------------------------|----------------------|------------------|------------|
| GO                                                         | pH=2                 | 65.2             | [27]       |
| GO-MnO <sub>2</sub> -Fe <sub>3</sub> O <sub>4</sub>        | pH=5                 | 193.1            | [28]       |
| MWCNTs (HNO <sub>3</sub> )                                 | pH=2                 | 9.5              | [29]       |
| MnO <sub>2</sub> -Fe <sub>3</sub> O <sub>4</sub> -o-MWCNTs | pH=2                 | 186.9            | [30]       |
| Polyaniline nanowires                                      | pH=5                 | 86.84            | [31]       |
| PPy-PANI                                                   | pH=2                 | 227.27           | [32]       |
| Fe <sub>3</sub> O <sub>4</sub> -PPy                        | pH=2                 | 209.2            | [33]       |
| PANI                                                       | pH=3                 | 198.67           | [34]       |
| glycine doped polypyrrole                                  | pH=2                 | 217              | [35]       |
| PEI-GO-Fe <sub>3</sub> O <sub>4</sub>                      | pH=2                 | 266.6            | [36]       |
| PEI-PVA microspheres                                       | pH=2                 | 396.825          | This study |

**Table S3.** Kinetics parameters for Cr(VI) adsorption onto PEI-PVA microspheres with different concentrations

| Concentration of Cr<br>(VI) ions (mg/L) | $q_e$ (mg/g) | $k_2$ (g mg <sup>-1</sup> min <sup>-1</sup> ) | $R^2$  |
|-----------------------------------------|--------------|-----------------------------------------------|--------|
| 160                                     | 218.34       | 0.000196                                      | 0.9958 |
| 200                                     | 318.47       | 0.000119                                      | 0.9950 |
| 250                                     | 363.64       | 0.000080                                      | 0.9959 |
